# Supplementary material
Source: MDPI journal article supplement (https://www.mdpi.com/2071-1050/12/22/9442)
Supplement: s1 [file s1]

## The Effect of Climate Change-Induced Temperature Increase on Animal Performance and Environmental Impact of Intensive Pig Production Systems

Stefan J. Hörtenhuber <sup>1,\*</sup>, Günther Schaubberger <sup>2</sup>, Christian Mikovits <sup>2,3</sup>, Johannes Baumgartner <sup>4</sup>, Knut Niebuhr <sup>4,†</sup>, Martin Piringer <sup>5</sup>, Ivonne Anders <sup>6</sup>, Konrad Andre <sup>6</sup>, Isabel Hennig-Pauka <sup>7</sup>, Martin Schönhart <sup>3</sup>, Werner Zollitsch <sup>1</sup>

**Table S1:** Sources, model assumptions and parameters of functions for important production traits of confined pigs in temperate Western European agriculture

|                        | (Sow plus) Suckling Piglets                                         | Weaned Piglets                                      | Growing and Finishing Pigs              |
|------------------------|---------------------------------------------------------------------|-----------------------------------------------------|-----------------------------------------|
| Literature sources     | GfE (2006) [1],<br>Dyck and Swierstra (1987) [2],<br>LfL (2014) [3] | GfE (2006) [1],<br>LfL (2014) [3]                   | GfE (2006) [1],<br>LfL (2014) [3]       |
| Body mass gain         |                                                                     |                                                     |                                         |
| Model assumption       | Gompertz function                                                   | Gompertz function                                   | Gompertz function                       |
| and parameters         | C = 1.693<br>L = 0.558<br>K = 0.195                                 | C = 1.466<br>L = 0.540<br>K = 0.130                 | C = 21.534<br>L = 0.186<br>K = 0.082    |
| Cumulative feed intake |                                                                     |                                                     |                                         |
| Model assumption       | Gompertz function <sup>a</sup>                                      | Gompertz function                                   | Gompertz function                       |
| and parameters         | C = 0.325<br>L = 1.263<br>K = 0.105                                 | C = 0.279<br>L = 0.860<br>K = 0.118                 | C = 12.500<br>L = 0.353<br>K = 0.091    |
| Feed conversion        |                                                                     |                                                     |                                         |
| Model assumption       |                                                                     | Polynomial function                                 | Gompertz function                       |
| and parameters         |                                                                     | a = 0.046<br>b = -0.241<br>c = 1.770                | C = 2.549<br>L = 0.001<br>K = -0.235    |
| Mortality              |                                                                     |                                                     |                                         |
| Model assumption       | Gompertz function                                                   | Gompertz function                                   | Linear function                         |
| and parameters         | C = $4.73 \times 10^{-5}$<br>L = 30.395<br>K = 3.776                | C = $7.64 \times 10^{-7}$<br>L = 6.149<br>K = 0.602 | a = $9.20 \times 10^{-4}$<br>b = 0.0001 |

<sup>a</sup> Including the sow's feed for the lactating phase only.

**Table S1:** List of literature sources defining temperature requirements, thermo-neutral zones, heat stress-temperatures and effects of increasing temperature on production traits

| Temperature Requirements,<br>Thermo-Neutral Zones and Heat Stress | Temperature Effects on Production Traits |
|-------------------------------------------------------------------|------------------------------------------|
|                                                                   | Kyriazakis and Whittemore, 2006 [7]      |
|                                                                   | Hyun et al., 1998 [8]                    |
|                                                                   | Kouba et al., 2001 [9]                   |
|                                                                   | Becker et al., 1992 [10]                 |
|                                                                   | Song, et al., 2011 [11]                  |
|                                                                   | Lefaucheur et al., 1991 [12]             |
|                                                                   | Le Dividich et al., 1980 [13]            |
| Troxler and Menke (2006) [4]                                      | Weller et al., 2013 [14]                 |
| Bracke (2011) [5]                                                 | Collin et al., 2002 [15]                 |
| Pig Site (2018) [6]                                               | Lopez et al., 1991 [16]                  |
| Kyriazakis and Whittemore (2006) [7]                              | White et al., 2008 [17]                  |
|                                                                   | Dividich, 1981 [18]                      |
|                                                                   | Rinaldo and Le Dividich, 1991 [19]       |
|                                                                   | Rinaldo et al., 2000 [20]                |
|                                                                   | Collin et al., 2001a [21]                |
|                                                                   | Collin et al., 2001b [22]                |
|                                                                   | Ferguson and Gous, 1997 [23]             |
|                                                                   | Oliveira and Donzele, 1999 [24]          |

**Table S2:** Composition of the sow diet (average over the whole production cycle) plus piglet feed and the average growing-finishing pig diet in percent (on 88 % dry matter basis)

| Ingredient                                                               | Proportions in Average<br>Sow Diet (%) | Proportions in Average<br>Growing - Finishing Pig Diet<br>(%) |
|--------------------------------------------------------------------------|----------------------------------------|---------------------------------------------------------------|
| Maize                                                                    | 35 %                                   | 57 %                                                          |
| Soybean meal, extracted                                                  | 15 %                                   | 16 %                                                          |
| Barley                                                                   | 17 %                                   | 15 %                                                          |
| Wheat (Wheat bran)                                                       | 15 % (5 %)                             | 6 % (1 %)                                                     |
| Rapeseed meal, extracted                                                 | 4 %                                    | -                                                             |
| Sunflower seed meal, extracted                                           | 4 %                                    | -                                                             |
| Soybean oil                                                              | -                                      | 1 %                                                           |
| Calcium carbonate and sodium chloride                                    | 3 %                                    | 2 %                                                           |
| Calcium phosphate, other minerals, synthetic amino acids, lignocellulose | 2 %                                    | 2 %                                                           |

**Table S3:** Inputs other than feed and sources given as specific energy demand related to animal places or body mass

| Inputs (Unit of Measurement)                                                                                                                                                                                                           | Average Values   | Data Source, Comment                                                                                  |
|----------------------------------------------------------------------------------------------------------------------------------------------------------------------------------------------------------------------------------------|------------------|-------------------------------------------------------------------------------------------------------|
| Electricity demand of livestock building including energy for the ventilation system (MJ per kg body mass gain piglet & growing-fattening pig),<br>for low temperature (year 1984)/high temperature (year 2003)/worst case temperature | 0.3/0.4/0.5      | Calculated based on unpublished primary data from farm surveys and Mikovits <i>et al.</i> (2019) [25] |
| Electricity for heating, infrared lamp (MJ per kg body mass gain piglet)                                                                                                                                                               | 9.6 <sup>a</sup> | Calculated based on Büscher (2006) [26]                                                               |
| Electricity demand feed mill (MJ per kg body mass gain piglet & growing-fattening pig)                                                                                                                                                 | 0.3              | Energy demand from GEMIS (v 4.7; Fritsche and Schmidt, 2007) [27] multiplied by feed intake           |
| Transports by tractor (transport of manure, etc.; ton-km per kg body mass gain piglet & growing-fattening pig)                                                                                                                         | 0.05             | Calculated for manure application with 5 km distance (including the return path)                      |
| Drinking and cleaning water (m <sup>3</sup> per kg body mass gain piglet & growing-fattening pig)                                                                                                                                      | 0.01             | Calculated based on DLG (2008) [28]                                                                   |

<sup>a</sup> 0.6 MJ per kg body mass gain finished pig

**Table S4:** Biogenic emissions (kg/kg body mass) as annual mean for the low temperature scenario for reared piglet and for growing-finishing pig (at farm-gate before slaughtering)

| Emissions Per kg Body Mass Gain | Annual Mean Emission for Piglets:<br>kg/kg Reared Piglet | Annual Mean Emission for Growing-Finishing Pigs:<br>kg/kg Finished Pig |
|---------------------------------|----------------------------------------------------------|------------------------------------------------------------------------|
| kg NH <sub>3</sub>              | 0.0269                                                   | 0.0625                                                                 |
| kg NO <sub>x</sub>              | 0.00001                                                  | 0.00002                                                                |
| kg N <sub>2</sub> O             | 0.00031                                                  | 0.00072                                                                |
| kg CH <sub>4</sub>              | 0.0094                                                   | 0.0145                                                                 |
| kg NO <sub>3</sub>              | 0.0306                                                   | 0.0710                                                                 |

**Table S6:** Elements related to climate change impacts in the feed production system

| <b>System Elements</b>                                                                                                                | <b>The Systems Elements Describe...</b>                                                                                                                                |
|---------------------------------------------------------------------------------------------------------------------------------------|------------------------------------------------------------------------------------------------------------------------------------------------------------------------|
| <b>Active elements (showing impacts on other system elements)</b>                                                                     |                                                                                                                                                                        |
| Climate change impacts (abiotic CCI)                                                                                                  | ... driving forces behind abiotic CCIs (increase in air temperature, etc.) and thus a significant factor influencing crop production                                   |
| Genetic potential of crops (concerning CCI)                                                                                           | ... the use of crops that are tolerant or resistant due to their genetic predisposition to diseases or abiotic CCIs                                                    |
| Irrigation                                                                                                                            | ... the use or / and installation of irrigation systems                                                                                                                |
| <b>Passive elements (receiving impacts from other system elements)</b>                                                                |                                                                                                                                                                        |
| Crop yields                                                                                                                           | ... high yields as an optimisation goal in the system analysis                                                                                                         |
| Dependence on technology and energy                                                                                                   | ... as an undesirable situation                                                                                                                                        |
| <b>Ambivalent elements (having impacts on other system elements, but at the same time receive strong effects from other elements)</b> |                                                                                                                                                                        |
| Biotic CCIs                                                                                                                           | ... pathogen-related (harvest-) losses in crop production                                                                                                              |
| Measures to increase the socio-economic resilience of production systems (PS) in general                                              | ... measures for socio-economic resilient PS; e.g., diversification of sources of income, the use of insurance options or investments into CCI-relevant infrastructure |
| Biogenic structures to increase agro-ecological resilience in crop production                                                         | ... measures to protect biodiversity or soils, e.g. hedges or permanent greening                                                                                       |
| (Change of) Factor costs for agricultural land                                                                                        | ... the impact of changing factor costs for land due to soil depletion or climate-induced yield changes                                                                |
| Positive farm's financial situation                                                                                                   | ... the socio-economic well-being of farmers; an optimization goal in the analysis                                                                                     |
| <b>Buffering elements (showing a buffering effect on a system)</b>                                                                    |                                                                                                                                                                        |
| Site-specific adjustment of inputs (intensity) and outputs                                                                            | ... a specific site adaptation measure and the PS that significantly contributes to maintaining or enhancing resilience                                                |
| Cooperation with other companies                                                                                                      | ... a specific and important measure to maintain or promote socio-economic resilience in the PS                                                                        |
| Insurances – crops and infrastructure                                                                                                 | ... a specific and significant measure to maintain or promote socio-economic resilience in the PS                                                                      |

The attributions ("active", "passive", "ambivalent" and "buffering") are automatically derived results of the system analysis (software Systain SystemQ). Especially categorizations for ambivalent and buffering factors are sometimes difficult, as there may be transitions between these groups.

**Table S7:** Elements related to climate change impacts and livestock

| <b>System Elements</b>                                                                                                                | <b>The Systems Elements Describe...</b>                                                                                                         |
|---------------------------------------------------------------------------------------------------------------------------------------|-------------------------------------------------------------------------------------------------------------------------------------------------|
| <b>Active elements (showing impacts on other system elements)</b>                                                                     |                                                                                                                                                 |
| Measures against direct CCI in housing systems                                                                                        | ... the effects of, for example, fans, shading, showers, air conditioning, etc. on animal welfare, health and productivity                      |
| Health plans and activities against diseases related to CCI                                                                           | ... measures that proactively tackle CCI-related animal health problems                                                                         |
| Solutions to maintain farm power supply                                                                                               | ... to be prepared against power (electricity) failure, i.a. for ventilation, air conditioning systems and water supply                         |
| Water supply                                                                                                                          | ... the situation regarding the availability of sufficient drinking water                                                                       |
| <b>Passive elements (receiving impacts from other system elements)</b>                                                                |                                                                                                                                                 |
| Farm's financial situation                                                                                                            | ... the economic performance of the farm, including results of long-term profitability                                                          |
| Livestock yields                                                                                                                      | ... the level of animal productivity                                                                                                            |
| Animal welfare / health                                                                                                               | ... the realized degree of animal welfare / health                                                                                              |
| <b>Ambivalent elements (having impacts on other system elements, but at the same time receive strong effects from other elements)</b> |                                                                                                                                                 |
| Diseases and losses related to CCI                                                                                                    | ... the incidence of illnesses and losses related to CCI                                                                                        |
| <b>Buffering elements (showing a buffering effect on a system)</b>                                                                    |                                                                                                                                                 |
| Genetic potential of livestock                                                                                                        | ... the use of pig genotypes that are tolerant or resistant against abiotic CCI-impacts and CCI-related diseases                                |
| Feed supply                                                                                                                           | ... the availability of feed of appropriate quality                                                                                             |
| Insurances                                                                                                                            | ... which are more or less important to maintain or promote socio-economic resilience (for buildings, crops and/or livestock)                   |
| Changing requirements for animal products due to society / politics / NGOs                                                            | ... a situation in which the demand for animal products changes, because, for instance, political measures have a positive or inhibiting effect |

The attributions ("active", "passive", "ambivalent" and "buffering") are automatically derived results of the system analysis (software Systain SystemQ). Especially categorizations for ambivalent and buffering factors are sometimes difficult, as there may be transitions between these groups. .

**Table S8:** Thermoneutral zones (TNZ) of domesticated pigs (°C)

| <b>Animal Category</b>   | <b>Average of Literature</b> | <b>Minimum</b> | <b>Maximum</b> |
|--------------------------|------------------------------|----------------|----------------|
| Suckling piglets (<7 kg) | 26–32                        | 22             | 33             |
| Weaned piglets (8–30 kg) | 23–29                        | 20             | 30             |
| Growing pigs (30–60 kg)  | 19–22                        | 18             | 25             |
| Finishing pigs (>60 kg)  | 17–21                        | 15             | 24             |
| Sows, after weaning      | 16–20                        | 15             | 20             |
| Sows, lactating          | 18–22                        | 16             | 22             |
| Boars                    | 18                           | 16             | 19             |

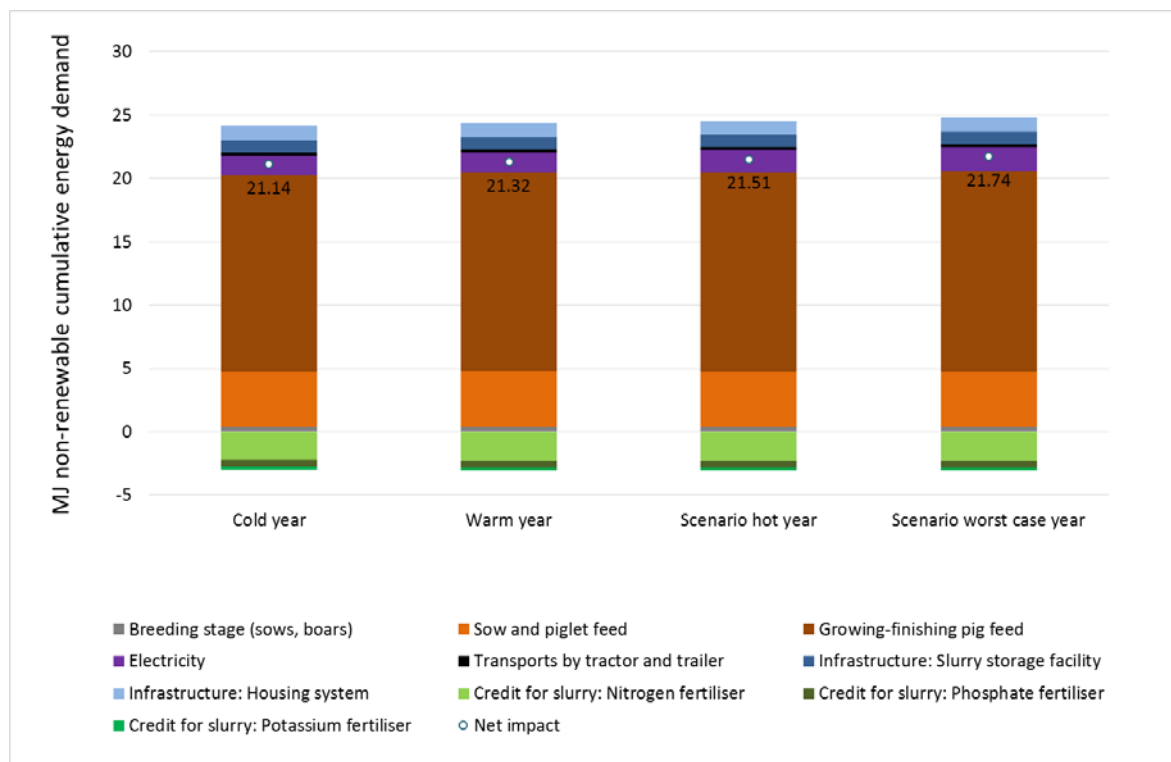

**Figure S1.** Use of fossil energy (CED non-renewable) in MJ per kg body mass at farm-gate.

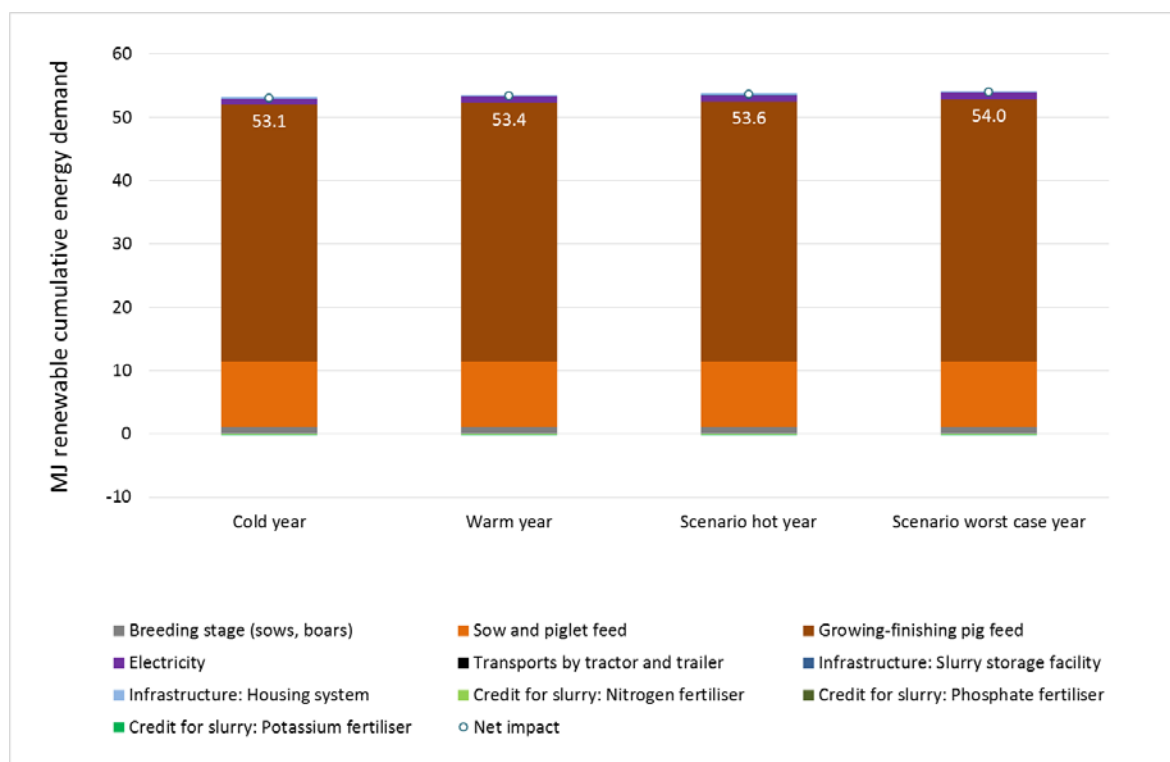

**Figure S2:** Use of renewable energy (CED renewable) in MJ per kg body mass at farm-gate

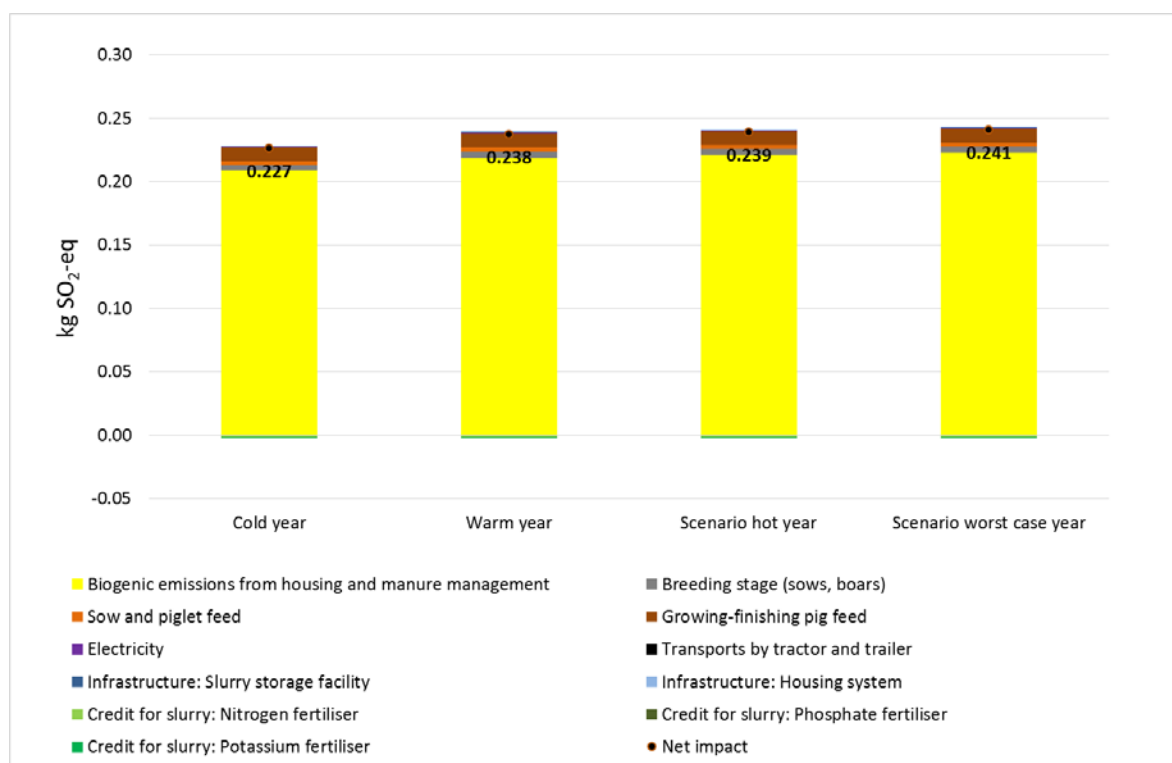

**Figure S1:** Acidification potential (AP) in kg SO<sub>2</sub>-eq per kg body mass at farm-gate

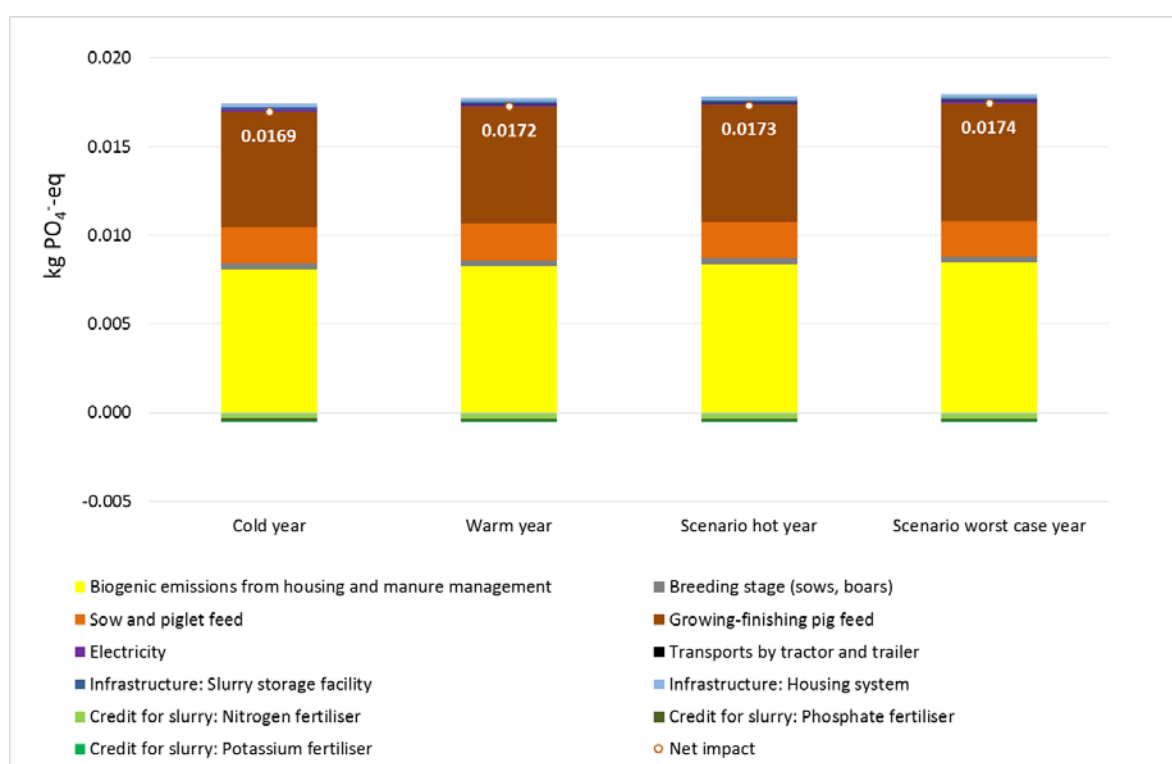

**Figure S4:** Eutrophication potential (EP) in kg PO<sub>4</sub>-eq per kg body mass at farm-gate

## References used for the Supplementary Materials

1. Gesellschaft für Ernährungsphysiologie, *Empfehlungen zur Energie- und Nährstoffversorgung von Schweinen*; DLG-Verlag: Frankfurt am Main, Germany, 2006; ISBN 978-3769006834.
2. Dyck, G. W., Swierstra, E.E. A l A = iø! s. *Can. J. Anim. Sci.* **1984**, 67, 543–547.
3. LfL - Bayrische Landesanstalt für Landwirtschaft Futterberechnung für Schweine. 2014. Available online: [https://docplayer.org/storage/49/25474613/1605214850/9GQHVxXu-H7AN\\_MshhheWw/25474613.pdf](https://docplayer.org/storage/49/25474613/1605214850/9GQHVxXu-H7AN_MshhheWw/25474613.pdf) (accessed on 12 November 2020).
4. Troxler, J.; Menke, C. *Handbuch Schweine*; Wien, 2006. Available online: [http://www.vet-ez.at/downloads/handbuch\\_schweine.pdf](http://www.vet-ez.at/downloads/handbuch_schweine.pdf) (accessed on 12 November 2020).
5. Bracke, M.B.M. Review of wallowing in pigs: Description of the behaviour and its motivational basis. *Appl. Anim. Behav. Sci.* **2011**, 132, 1–13, doi:10.1016/j.applanim.2011.01.002
6. Pig Site – Dealing with drought and evading heat stress in swine. <https://thepigsite.com/articles/dealing-with-drought-and-evading-heat-stress-in-swine> (accessed 13 July 2020)
7. Kyriazakis, I.; Whittemore, C.T. *Whittemore 's Science and Practice of Pig Production*; Blackwell Publishing: Oxford, UK, 2006; ISBN 9781405124485.
8. Hyun, Y.; Ellis, M.; Riskowski, G.; Johnson, R.W. Growth performance of pigs subjected to multiple concurrent environmental stressors. *J. Anim. Sci.* **1998**, 76, 721–727.
9. Kouba, M.; Hermier, D.; Le Dividich, J. Influence of a high ambient temperature on lipid metabolism in the growing pig. *J. Anim. Sci.* **2001**, 79, 81–87, doi:10.2527/2001.79181x.
10. Becker, B.A.; Knight, C.D.; Buonomo, F.C.; Jesse, G.W.; Hedrick, H.B.; Baile, C.A. Effect of a hot environment on performance, carcass characteristics, and blood hormones and metabolites of pigs treated with porcine somatotropin. *J. Anim. Sci.* **1992**, 70, 2732–2740, doi:10.2343/geochemj.36.333.
11. Song, R.; Foster, D.N.; Shurson, G.C. Effects of feeding diets containing bacitracin methylene disalicylate to heat-stressed finishing pigs. *J. Anim. Sci.* **2011**, 89, 1830–1843, doi:10.2527/jas.2010-3218.
12. Lefaucheur, L.; Le Dividich, J.; Mourot, J.; Monin, G.; Ecolan, P.; Krauss, D. Influence of environmental temperature on growth, muscle and adipose tissue metabolism, and meat quality in swine. *J. Anim. Sci.* **1991**, 69, 2844–2854, doi:10.2527/1991.6972844x.
13. Le Dividich, J.; Vermorel, M.; Noblet, J.; Bouvier, J.C.; Aumaitre, D.A. Effects of environmental temperature on heat production, energy retention, protein and fat gain in early weaned piglets. *Br. J. Nutr.* **1980**, 44, 313–323, doi:10.1079/BJN19800046.
14. Weller, M.M.D.C.A.; Alebrante, L.; Campos, P.H.R.F.; Saraiva, A.; Silva, B.A.N.; Donzele, J.L.; Oliveira, R.F.M.; Silva, F.F.; Gasparino, E.; Lopes, P.S.; et al. Effect of heat stress and feeding phosphorus levels on pig electron transport chain gene expression. *Animal* **2013**, 7, 1985–1993, doi:10.1017/S1751731113001535.
15. Collin, A.; Vaz, M.-J.; Dividich, J. Le Effects of high temperature on body temperature and hormonal adjustments in piglets. *Reprod. Nutr. Dev.* **2002**, 42, 45–53.
16. Lopez, J.; Jesse, G.W.; Becker, B.A.; Ellersieck, M.R. Effects of temperature on the performance of finishing swine: I. Effects of a hot, diurnal temperature on average daily gain, feed intake, and feed efficiency. *J. Anim. Sci.* **1991**, 69, 1843–1849, doi:10.2527/1991.6951843x.
17. White, H.M.; Richert, B.T.; Schinckel, A.P.; Burgess, J.R.; Donkin, S.S.; Latour, M.A. Effects of temperature stress on growth performance and bacon quality in grow-finish pigs housed at two densities. *J. Anim. Sci.* **2008**, 86, 1789–1798, doi:10.2527/jas.2007-0801.
18. Dividich, J.L.E. Effects of Environmental Temperature on the Growth Rates of Early-Weaned Piglets. *Livest. Pro* **1981**, 8, 75–86.
19. Rinaldo, D.; Le Dividich, J. Assessment of optimal temperature for performance and chemical body composition of growing pigs. *Livest. Prod. Sci.* **1991**, 29, 61–75, doi:10.1016/0301-6226(91)90120-F.
20. Rinaldo, D.; Le Dividich, J.; Noblet, J. Adverse effects of tropical climate on voluntary feed intake and performance of growing pigs. *Livest. Prod. Sci.* **2000**, 66, 223–234, doi:10.1016/S0301-

6226(00)00181-0.

21. Collin, A.; van Milgen, J.; Dubois, S.; Noblet, J. Effect of high temperature on feeding behaviour and heat production in group-housed young pigs. *Br. J. Nutr.* **2001**, *86*, 63, doi:10.1079/BJN2001356.
22. Collin, A.; Van Milgen, J.; Dubois, S.; Noblet, J. Effect of high temperature and feeding level on energy utilization in piglets. *J. Anim. Sci.* **2001**, *79*, 1849–1857, doi:10.2527/2001.7971849x.
23. Ferguson, N.S.; Gous, R.M. The influence of heat production on voluntary food intake in growing pigs given protein-deficient diets. *Anim. Sci.* **1997**, *64*, 365–378, doi:10.1017/S1357729800015939.
24. Oliveira, R.F.M.; Donzele, J.L. Effect of environmental temperature on performance and on physiological and hormonal parameters of gilts fed at different levels of digestible energy. *Anim. Feed Sci. Technol.* **1999**, *81*, 319–331, doi:10.1016/S0377-8401(99)00068-1.
25. Mikovits, C.; Zollitsch, W.; Hörtenhuber, S.J.; Baumgartner, J.; Niebuhr, K.; Piringer, M.; Anders, I.; Andre, K.; Hennig-Pauka, I.; Schönhart, M.; et al. Impacts of global warming on confined livestock systems for growing-fattening pigs: simulation of heat stress for 1981 to 2017 in Central Europe. *Int. J. Biometeorol.* **2019**, *63*, 221–230, doi:10.1007/s00484-018-01655-0.
26. Büscher, W. Energieverbraucher im Stall und Einflüsse der Klimatechnik auf Leistung und Gesundheit bei Schweinen und Geflügel. In *Energieversorgung in Geflügel- und Schweineställen, KTBL-Schrift 445*; KTBL: Darmstadt, Germany, 2006; pp. 30–42.
27. Fritsche, U.R.; Schmidt, K. *Globales Emissions-Modell Integrierter Systeme (GEMIS), Handbuch zu GEMIS 4.4*; Darmstadt, Germany, 2007.
28. DLG; Ratschow, J.P.; Schulte-Sutrum, R.; Westfalen-Lippe, L.; Büscher, W.; Nannen, C.; Feller, B. DLG Merkblatt 346 Kühlung von Schweineställen. 2008. Available online: [https://www.dlg.org/fileadmin/downloads/landwirtschaft/themen/publikationen/merkblaetter/dlg-merkblatt\\_346.pdf](https://www.dlg.org/fileadmin/downloads/landwirtschaft/themen/publikationen/merkblaetter/dlg-merkblatt_346.pdf) (accessed on 12 November 2020).
